# Supplementary material for: Non–IgE- or Mixed IgE/Non–IgE-Mediated Gastrointestinal Food Allergies in the First Years of Life: Old and New Tools for Diagnosis
Source: MDPI journal article supplement (doi:10.3390/nu13010226), 2021-01-14
Supplement: s1 [file s1]

**Table S1. Search strategies and results in PubMed (MedLine) and EMBASE**

| <b>Search Terms</b>                                                   | <b>Results on Pubmed.gov</b> | <b>Results on Embase.com</b> | <b>Non-overlapping Records</b> |
|-----------------------------------------------------------------------|------------------------------|------------------------------|--------------------------------|
| "Non IgE mediated food allergy" AND "infant"                          | 178                          | 292                          | 405                            |
| "Non IgE mediated food hypersensitivity" AND "infant"                 | 156                          | 282                          | 380                            |
| "Eosinophil esophagitis" AND "infant"                                 | 221                          | 87                           | 298                            |
| "Eosinophilic gastroenteritis" AND "Infant"                           | 42                           | 53                           | 81                             |
| "Eosinophilic colitis" and "infant"                                   | 47                           | 26                           | 61                             |
| "Food Protein Induced Enteropathy" and "Infant"                       | 240                          | 436                          | 594                            |
| "Food Protein Induced Proctocolitis"                                  | 60                           | 74                           | 108                            |
| "Food Protein Induced Enterocolitis"                                  | 352                          | 300                          | 578                            |
| "non IgE mediated food allergy" AND "patch test"                      | 111                          | 64                           | 173                            |
| "Non IgE mediated food allergy" AND "infant" AND "endoscopy"          | 2                            | 16                           | 17                             |
| "Non IgE mediated food hypersensitivity" AND "infant" AND "endoscopy" | 2                            | 15                           | 16                             |
| "Eosinophil esophagitis" AND "infant" AND "endoscopy"                 | 118                          | 57                           | 160                            |
| "Eosinophilic gastroenteritis" AND "infant" AND "endoscopy"           | 17                           | 20                           | 35                             |
| "Food Protein Induced Enteropathy" AND "infant" AND "endoscopy"       | 7                            | 32                           | 33                             |
| "Food Protein Induced Proctocolitis" AND "endoscopy"                  | 5                            | 38                           | 38                             |
| "Food Protein Induced Enterocolitis" AND "endoscopy"                  | 6                            | 37                           | 37                             |
| "CoMiSS" AND "food allergy"                                           | 11                           | 22                           | 29                             |
| "CoMiSS" AND "cow's milk allergy"                                     | 14                           | 23                           | 33                             |
| "CoMiSS" AND "cow's milk protein allergy"                             | 11                           | 20                           | 28                             |
| "CoMiSS" AND "non IgE mediated food allergy"                          | 2                            | 3                            | 3                              |
| "Cow's milk related score" AND "food allergy"                         | 33                           | 32                           | 49                             |
| "Cow's milk related score" AND "cow's milk allergy"                   | 38                           | 43                           | 65                             |
| "Cow's milk related score" AND "cow's milk protein allergy"           | 25                           | 31                           | 46                             |
| "Cow's milk related score" AND "non IgE mediated food allergy"        | 5                            | 4                            | 6                              |
| "Symptom based score" AND "food allergy"                              | 150                          | 83                           | 194                            |
| "Symptom based score" AND "cow's milk allergy"                        | 37                           | 35                           | 57                             |
| "Symptom based score" AND "cow's milk protein allergy"                | 31                           | 25                           | 43                             |
| "Symptom based score" AND "non IgE mediated food allergy"             | 6                            | 7                            | 10                             |
| "Faecal biomarkers" AND "cow's milk allergy"                          | 7                            | 5                            | 11                             |
| "Faecal biomarkers" AND "non IgE mediated food allergy"               | 7                            | 4                            | 10                             |
| "Faecal biomarkers" AND "food allergy"                                | 22                           | 22                           | 40                             |
| "Faecal calprotectin" AND "cow's milk allergy"                        | 11                           | 30                           | 33                             |
| "Faecal calprotectin" AND "non IgE mediated food allergy"             | 8                            | 9                            | 16                             |

|                                                                      |      |      |      |
|----------------------------------------------------------------------|------|------|------|
| "Faecal calprotectin" AND "food allergy"                             | 23   | 61   | 75   |
| "Faecal IgA" AND "cow's milk allergy"                                | 2    | 11   | 11   |
| "Faecal IgA" AND "non IgE mediated food allergy"                     | 1    | 2    | 2    |
| "Faecal IgA" AND "food allergy"                                      | 19   | 4    | 13   |
| "Faecal tumor necrosis factor" AND "cow's milk allergy"              | 1    | 8    | 8    |
| Faecal tumor necrosis factor AND non IgE mediated food allergy       | 2    | 5    | 6    |
| Faecal tumor necrosis factor AND food allergy                        | 5    | 18   | 22   |
| Faecal eosinophil cationic protein and cow's milk allergy            | 2    | 1    | 2    |
| Faecal eosinophil cationic protein AND non IgE mediated food allergy | 1    | 0    | 0    |
| Faecal eosinophil cationic protein AND food allergy                  | 5    | 3    | 5    |
| $\beta$ -defensin AND cow's milk allergy                             | 1    | 7    | 7    |
| $\beta$ -defensin AND non IgE mediated food allergy                  | 0    | 3    | 3    |
| $\beta$ -defensin AND food allergy                                   | 3    | 69   | 71   |
| $\alpha$ -1 antitrypsin AND cow's milk allergy                       | 2    | 14   | 14   |
| $\alpha$ -1 antitrypsin AND non IgE mediated food allergy            | 1    | 4    | 4    |
| $\alpha$ -1 antitrypsin AND food allergy                             | 5    | 55   | 56   |
| Eosinophil derived neurotoxin AND cow's milk allergy                 | 3    | 6    | 8    |
| Eosinophil derived neurotoxin AND non IgE mediated food allergy      | 3    | 8    | 9    |
| Eosinophil derived neurotoxin AND food allergy                       | 12   | 34   | 40   |
| Faecal occult blood AND cow's milk allergy                           | 8    | 27   | 34   |
| Faecal occult blood AND non IgE mediated food allergy                | 2    | 9    | 10   |
| Faecal occult blood AND food allergy                                 | 7    |      | 50   |
| IgG AND IgG4 AND non IgE mediated food allergy                       | 15   | 21   | 33   |
| IgG AND IgG4 AND non IgE mediated gastrointestinal food allergy      | 3    | 7    | 9    |
| IgG AND IgG4 and "cow milk allergy"                                  | 12   | 10   | 33   |
| "Laboratory findings" AND non IgE gastrointestinal food allergies    | 2    | 3    | 3    |
| IgG AND IgG4 AND Eosinophilic esophagitis                            | 29   | 23   | 49   |
| IgG AND IgG4 AND Food Protein Induced Enterocolitis                  | 2    | 5    | 5    |
| "Lymphocyte stimulation test" AND non IgE mediated food allergy      | 4    | 23   | 2    |
| "Lymphocyte stimulation test" AND "cow milk allergy"                 | 2    | 15   | 15   |
| "Laboratory findings" AND non IgE gastrointestinal food allergies    | 2    | 10   | 11   |
| "Lymphocyte stimulation test" AND Eosinophilic esophagitis           | 0    | 1    | 1    |
| "Lymphocyte stimulation test" AND Food Protein Induced Enterocolitis | 6    | 18   | 19   |
| TOTAL                                                                | 2287 | 2864 | 4318 |
